# Supplementary material
Source: PubMed Central journal article supplement (PMC11068001)
Supplement: 18_2020_3485_MOESM1_ESM.pdf [file 18_2020_3485_MOESM1_ESM.pdf]

## **Supplemental information**

### **Anti-adipogenic signals at the onset of obesity–related inflammation in white adipose tissue**

Tiziana Caputo<sup>1</sup>, Van Du T Tran<sup>2</sup>, Nasim Bararpour<sup>3,4</sup>, Carine Winkler<sup>1</sup>, Gabriela Aguilera<sup>1</sup>, Khanh Bao Trang<sup>1</sup>, Greta MP Giordano Attianese<sup>1</sup>, Anne Wilson<sup>5</sup>, Aurelien Thomas<sup>3,4</sup>, Marco Pagni<sup>2</sup>, Nicolas Guex<sup>2,6</sup>, Béatrice Desvergne<sup>1\*</sup> and Federica Gilardi<sup>1,3,4\*</sup>.

<sup>1</sup> Center for Integrative Genomics, University of Lausanne, Lausanne, Switzerland

<sup>2</sup> Vital-IT Group, SIB Swiss Institute of Bioinformatics, Lausanne, Switzerland.

<sup>3</sup>Unit of Forensic Toxicology and Chemistry, CURML, Lausanne University Hospital-Geneva University Hospitals, Switzerland.

<sup>4</sup>Faculty Unit of Toxicology, CURML, Lausanne University Hospital, Faculty of Biology and Medicine, University of Lausanne, Switzerland.

<sup>5</sup>Department of Oncology, University of Lausanne, Epalinges, Switzerland.

<sup>6</sup>Bioinformatics Competence Center, University of Lausanne, Switzerland.

#### **\*Corresponding Authors:**

Federica Gilardi: federica.gilardi@chuv.ch

Béatrice Desvergne: beatrice.desvergne@unil.ch

## Figure S1

(A, B, C) Schematic representation of the CTR and HFD feeding experimental procedure and of the BrdU administration protocol. (D) Number of mice used in each individual data point and pool for both ChIP-seq and RNA-seq. Low responders correspond to mice that were not included in the analysis because of their low inflammatory response after HFD treatment.

## Figure S2

(A) SPIA plot performed in vWAT and scWAT at 20 weeks. The X-axis shows the over-representation evidence ( $P_{\text{NDE}}$ ), while the Y-axis shows the perturbation evidence ( $P_{\text{TERT}}$ ). Each pathway is represented by a dot. Pathways above the oblique red line (red dots) are significant at 5% after Bonferroni correction, while those above the oblique blue line are significant at 5% after FDR correction (blue dots). The vertical and horizontal thresholds represent the same corrections for the two types of evidence considered individually. Pathways with a  $\log(P_{\text{NDE}})$  higher than 15 are represented by a small vertical bar.

(B) Log<sub>2</sub> Gene expression level of proliferation related genes *Mki67*, *E2f1* and *Zfp423* in vWAT (top) and scWAT (bottom) from controls or HFD treated mice after 1, 8 and 20 weeks. (n=6).

(C) Log<sub>2</sub> Gene expression level of Mature adipocyte markers *Ppar $\gamma$*  in vWAT and scWAT from control or HFD treated mice after 1, 8 and 20 weeks. Fold change ( $\Delta$ ) is reported for both tissues. Significance between the indicated groups was calculated using a two-tailed Student's *t*-test. \*(*p*-value < 0.05), \*\* (*p*-value < 0.01), \*\*\* (*p*-value < 0.001), \*\*\*\* (*p*-value < 0.0001).

### Figure S3

(A) Box plot of average tag density on the 711 regions in cluster 2 (green) for RNAPoIII, H3K4me1 and H3K27Ac. (B) Log<sub>2</sub> Gene expression level of scWAT specific Wnt genes: *Wnt2*, *Wnt10b* (top) and vWAT specific: *Wnt2b*, *Wnt5b*, *Wnt7b* (bottom), calculated in all control mice from all time points (n= 18). Significance between the indicated groups was calculated using a two-tailed Student's *t*-test. \* (*p*-value < 0.05), \*\* (*p*-value < 0.01), \*\*\* (*p*-value < 0.001), \*\*\*\* (*p*-value < 0.0001).

### Figure S4

(A) GO terms enriched (*p*-value < 0.05) in pathway analysis using a metabolic model for at least 3 among 4 comparisons either between tissues (vWAT and scWAT) or between diets (HFD and control). For tissues, at least one comparison has test statistic  $E \geq 0.1$ . For diets, at least one contrast has  $E \geq 0.05$ . In magenta, GO terms related to cGMP. In blue, those related to thermogenesis for tissue contrasts. In magenta, those concerning prostaglandin biosynthesis. Black \*: *p*-value < 0.05 in at least three among 4 comparisons, grey \*: *p*-value < 0.05 in less than three among 4 comparisons. (B) Potential causal genes with their effect for angiogenesis-related GO terms.

### Figure S5

(A) Depletion curves of the gene set *g* for two conditions U, V with their replicates. (B) Overview of enriched GO terms for all pairwise comparisons. GO terms enriched with  $E \geq 0.1$  in at least one contrast,  $E$  is set to 0 when *p*-value  $\geq 0.05$ . In blue, pairs involving contrast vWAT: scWAT. #: 4 contrasts between diets (HFD and control), \*: 4 contrasts between tissues (vWAT and scWAT).

## Figure S6

(A) Log<sub>2</sub> Gene expression level of Apoptosis markers *Casp3* and *Bcl2l1l* in vWAT (top) and scWAT (bottom) from control or HFD treated mice after 1, 8 and 20 weeks (n=6). Data are represented as mean ± SD. Significance between the indicated groups was calculated using a two-tailed Student's *t*-test. \* (*p*-value < 0.05), \*\* (*p*-value < 0.01), \*\*\*\* (*p*-value < 0.0001)

(B) Principal Component Analysis (PCA) performed using 7 variables: gene expression levels of *Ccl2*, *Itgax* and *Cxcl12*, plasma levels of insulin, resistin and leptin, and individual mouse weight in 61 mice treated for 8 weeks either with CTR (16) (black) or HFD (45) (red). Each point represents a mouse. (C) Same as in B in 58 mice treated for 20 weeks either with CTR (20) (black) or HFD (38) (red). A red panel was added to indicate the mice selected as “high responders”.



### **Table S1**

List of commonly regulated genes between HFD and CTR in the “Focal adhesion” and “ECM-receptor interaction” pathways in both vWAT and scWAT after 1 week of HFD feeding, with log<sub>2</sub> fold change and Benjamini-Hochberg adjusted *p*-value.

### **Table S2**

List of regulated genes between HFD and CTR in the “Alcoholism” and “Systemic lupus erythematosus” pathways in vWAT after 1 week of HFD feeding, with log<sub>2</sub> fold change and Benjamini-Hochberg adjusted *p*-value. Genes highlighted in bold are common to the two pathways.

### **Table S3**

List of regulated genes between HFD and CTR in the “Parkinson disease”, “Alzheimer disease” and “Huntington disease,” pathways in scWAT after 1 week of HFD feeding, with log<sub>2</sub> fold change and Benjamini-Hochberg adjusted *p*-value. Genes highlighted in bold are common to the three pathways.

### **Table S4**

(A) List of regulated genes between HFD and CTR in the “Cell cycle” pathway in scWAT after 8 weeks of HFD feeding, with log<sub>2</sub> fold change Benjamini-Hochberg adjusted *p*-value.

(B) List of genes in the “Systemic Lupus Erythematosus” pathway that are shared between the three time points (1, 8 and 20 weeks) in both vWAT and scWAT

# Supplementary 1

**A**

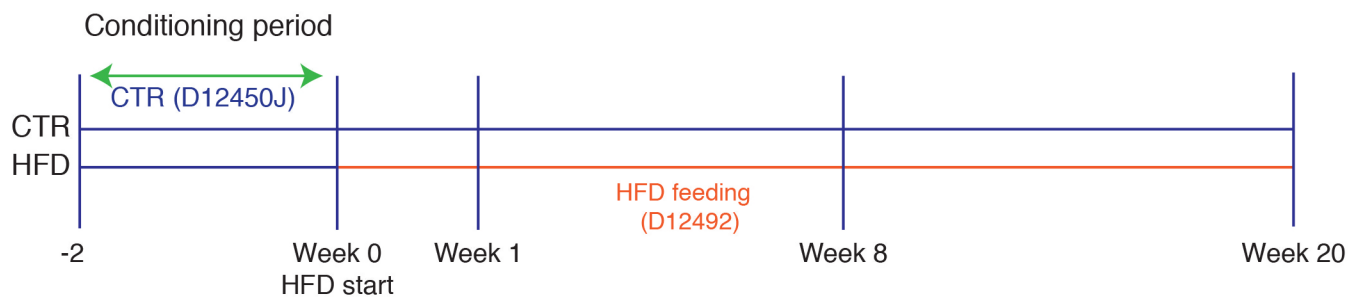

**B**

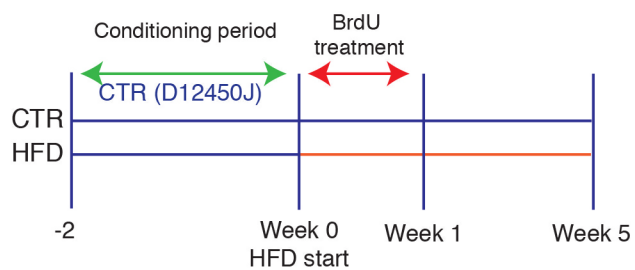

**C**

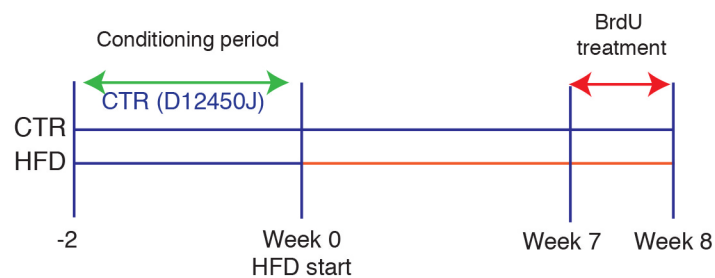

**D**

|                 |                | 1 week   |      |          |      |         |      |         |     |
|-----------------|----------------|----------|------|----------|------|---------|------|---------|-----|
|                 |                | CTR n=64 |      | HFD n=48 |      |         |      |         |     |
| <b>ChIP-seq</b> | CTR1           | n=32     | CTR2 | n=32     | HFD1 | n=24    | HFD2 | n=24    |     |
|                 | <b>RNA-seq</b> | CTR 1.1  | n=10 | CTR 2.1  | n=10 | HFD 1.1 | n=8  | HFD 2.1 | n=8 |
|                 |                | CTR 1.2  | n=10 | CTR 2.2  | n=10 | HFD 1.2 | n=8  | HFD 2.2 | n=8 |
|                 |                | CTR 1.3  | n=10 | CTR 2.3  | n=10 | HFD 1.3 | n=8  | HFD 2.3 | n=8 |

|                 |                | 8 weeks  |      |          |      |         |      |         |                  |      |
|-----------------|----------------|----------|------|----------|------|---------|------|---------|------------------|------|
|                 |                | CTR n=40 |      | HFD n=45 |      |         |      |         |                  |      |
| <b>ChIP-seq</b> | CTR1           | n=20     | CTR2 | n=20     | HFD1 | n=17    | HFD2 | n=17    | "Low responders" | n=11 |
|                 | <b>RNA-seq</b> | CTR 1.1  | n=7  | CTR 2.1  | n=7  | HFD 1.1 | n=5  | HFD 2.1 | n=5              |      |
|                 |                | CTR 1.2  | n=7  | CTR 2.2  | n=7  | HFD 1.2 | n=6  | HFD 2.2 | n=6              |      |
|                 |                | CTR 1.3  | n=6  | CTR 2.3  | n=6  | HFD 1.3 | n=6  | HFD 2.3 | n=6              |      |

|                 |                | 20 weeks |      |          |      |         |      |         |                  |     |
|-----------------|----------------|----------|------|----------|------|---------|------|---------|------------------|-----|
|                 |                | CTR n=26 |      | HFD n=35 |      |         |      |         |                  |     |
| <b>ChIP-seq</b> | CTR1           | n=13     | CTR2 | n=13     | HFD1 | n=17    | HFD2 | n=17    | "Low responders" | n=1 |
|                 | <b>RNA-seq</b> | CTR 1.1  | n=7  | CTR 2.1  | n=7  | HFD 1.1 | n=5  | HFD 2.1 | n=5              |     |
|                 |                | CTR 1.2  | n=7  | CTR 2.2  | n=7  | HFD 1.2 | n=6  | HFD 2.2 | n=6              |     |
|                 |                | CTR 1.3  | n=6  | CTR 2.3  | n=6  | HFD 1.3 | n=6  | HFD 2.3 | n=6              |     |

A

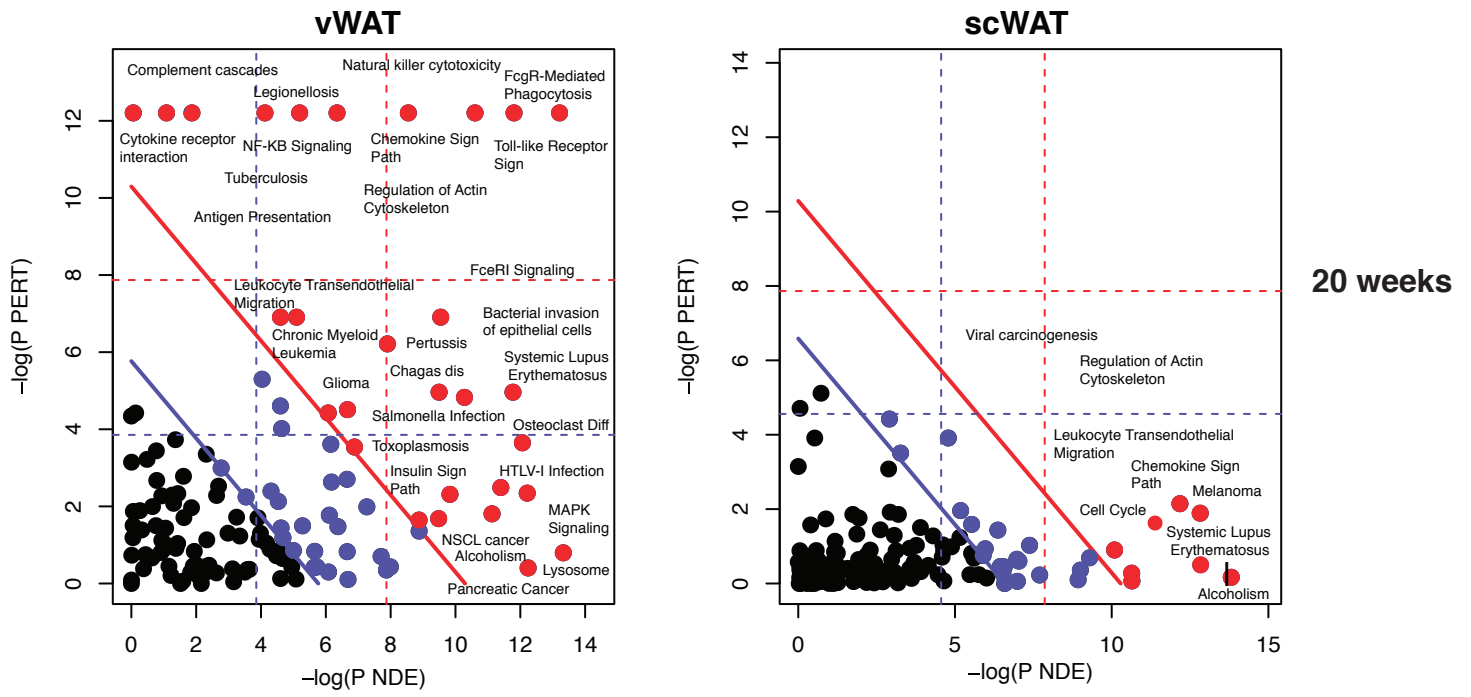

B

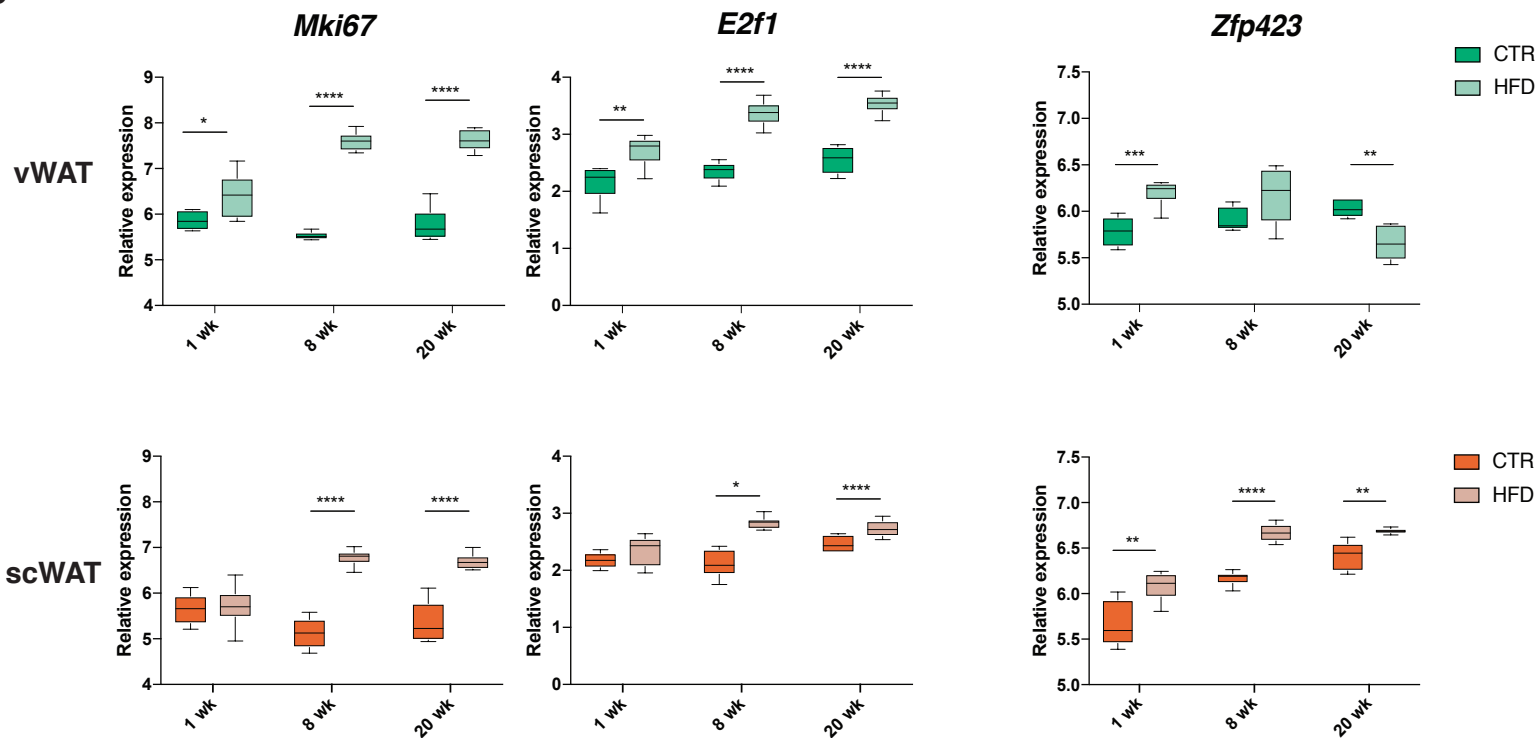

C

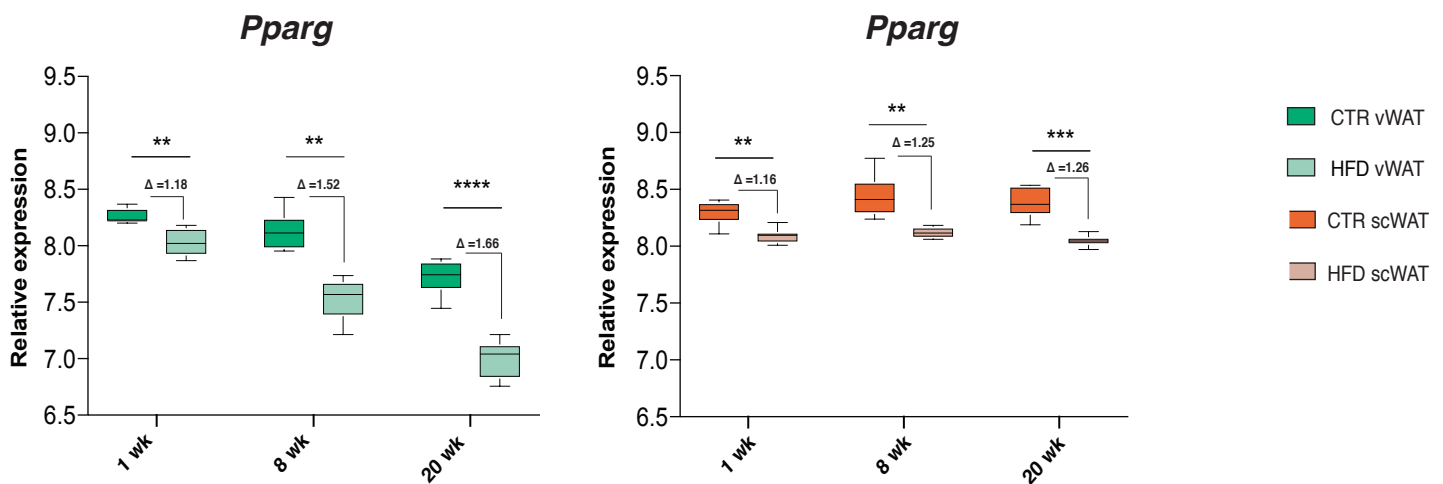

A

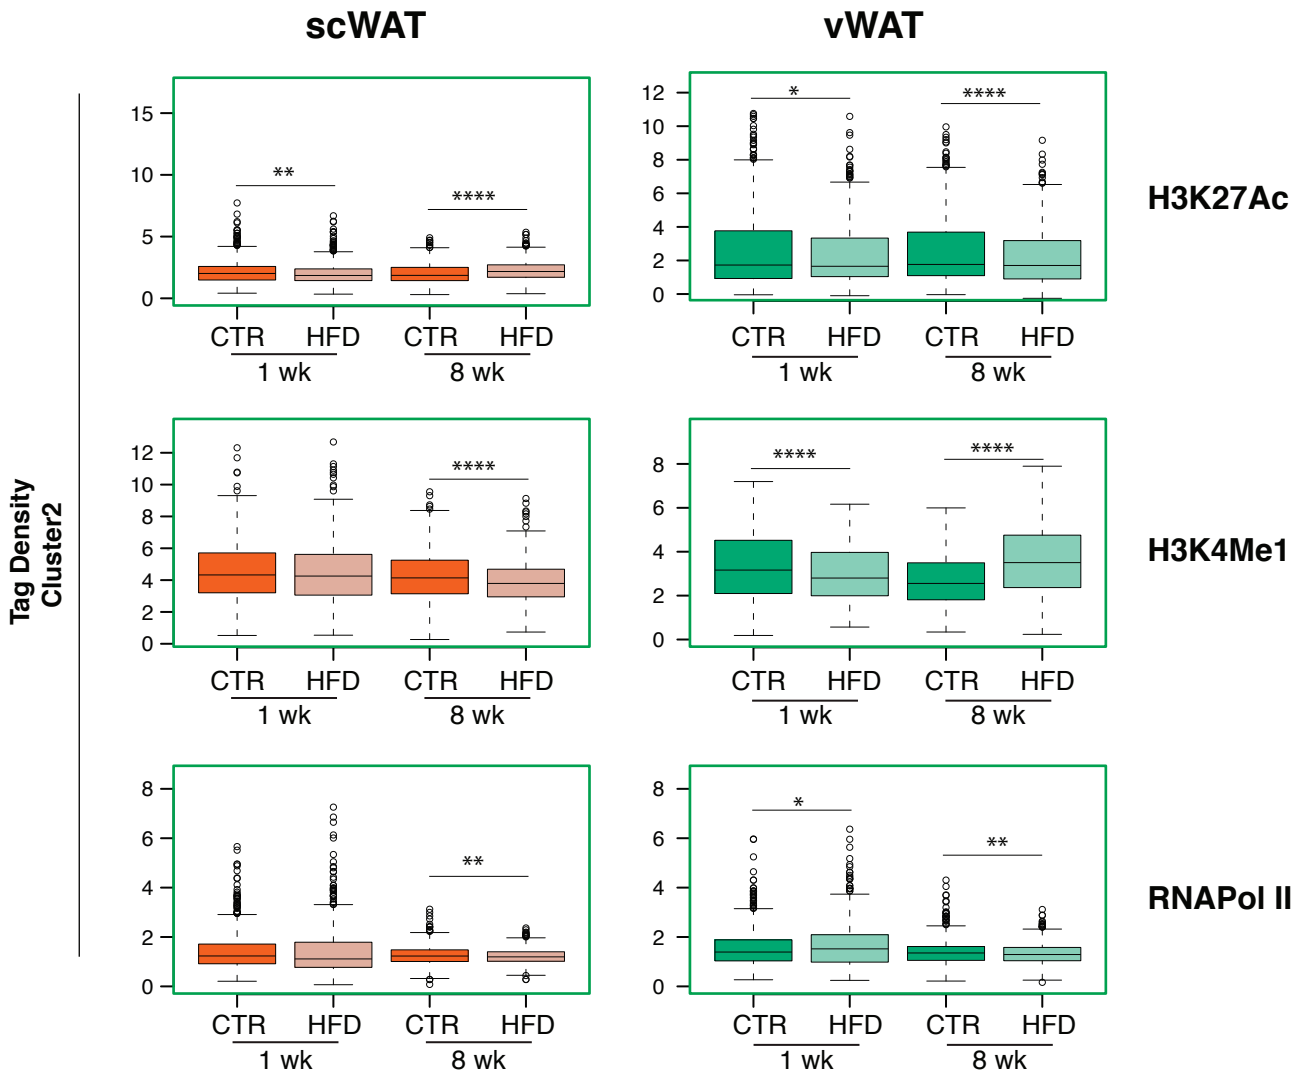

B

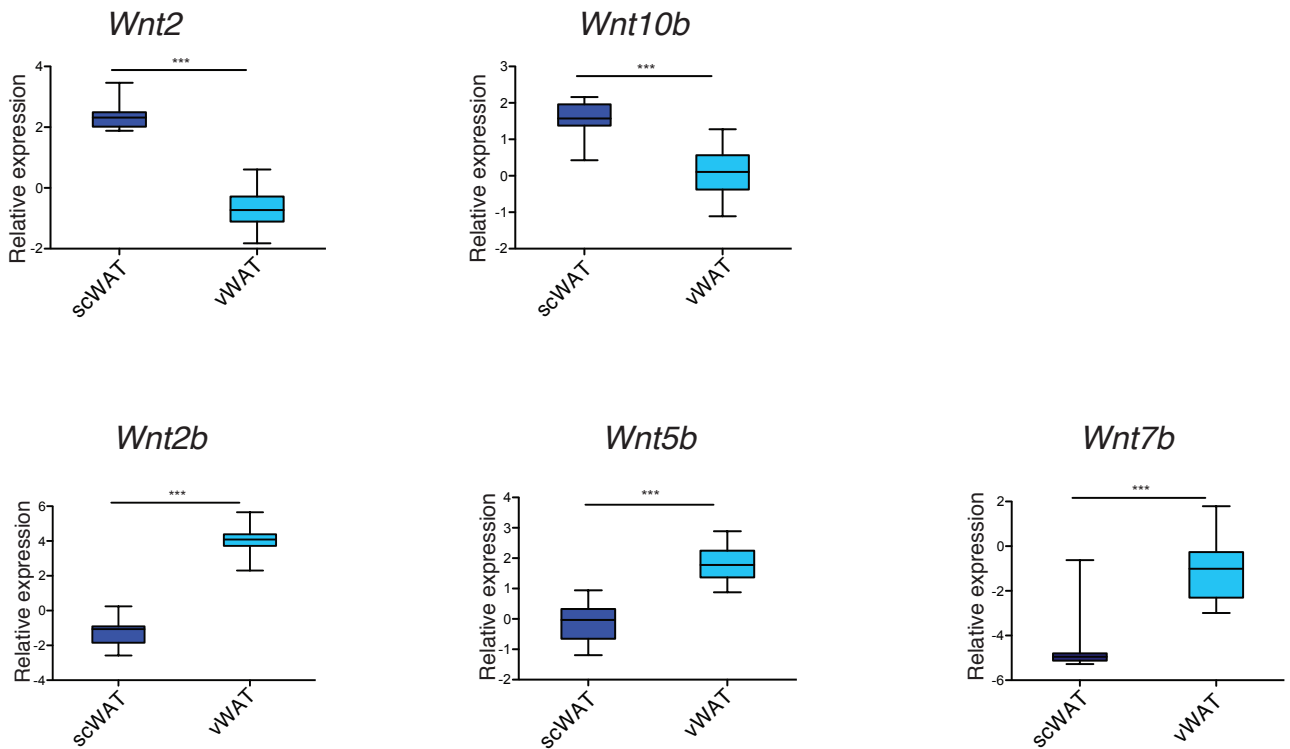

# Supplementary 4

A

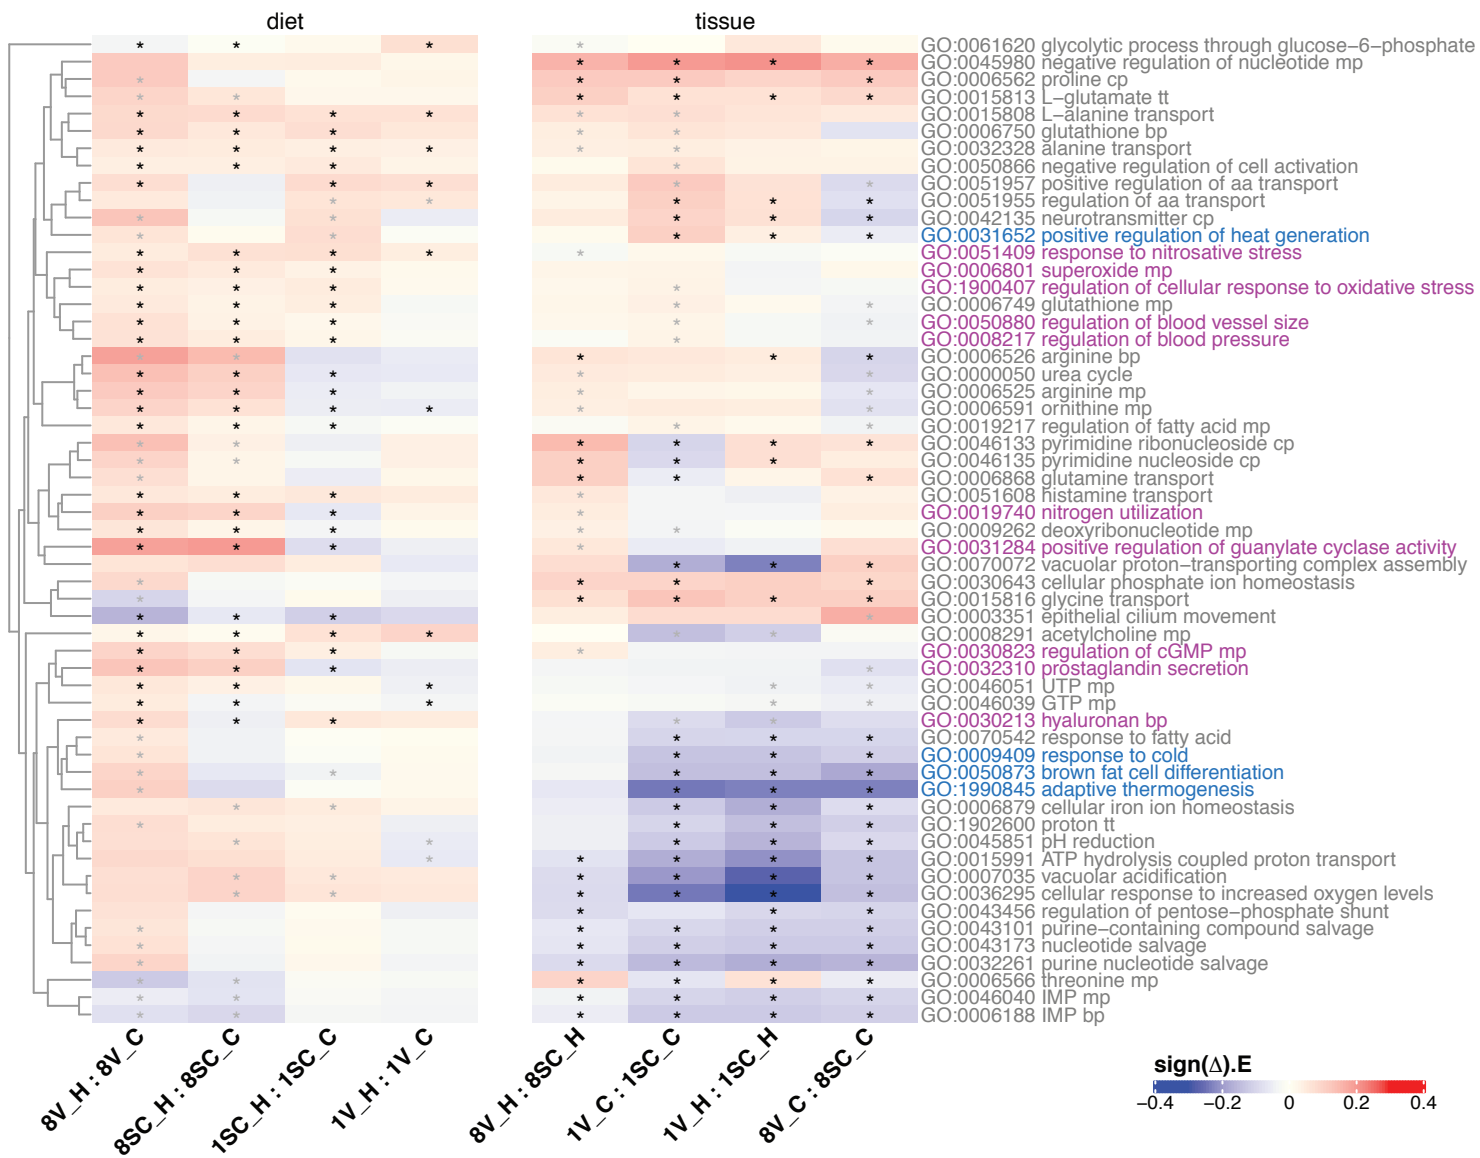

B

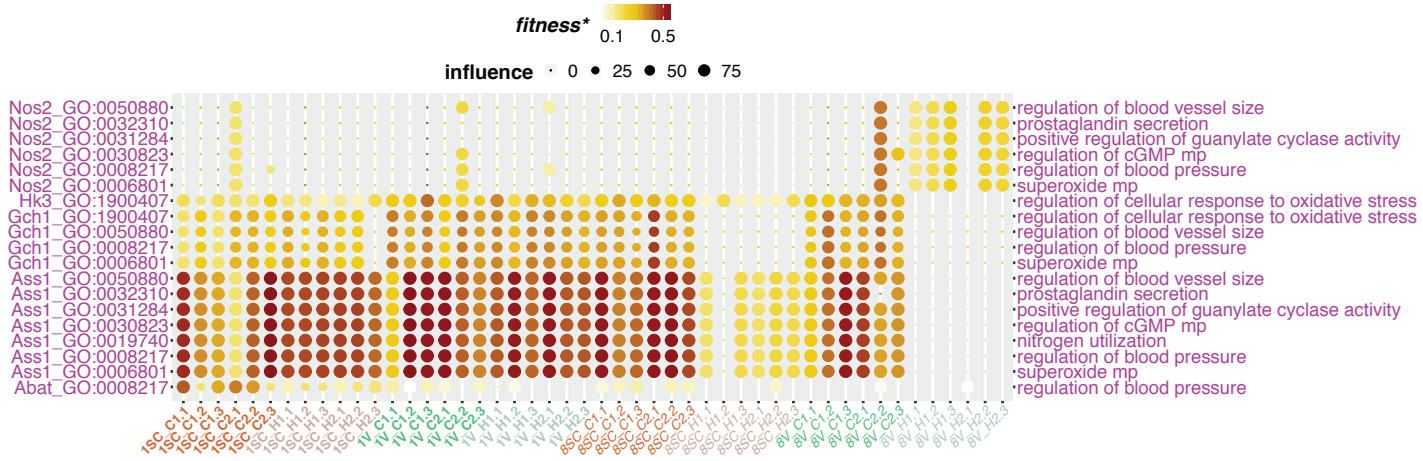

A

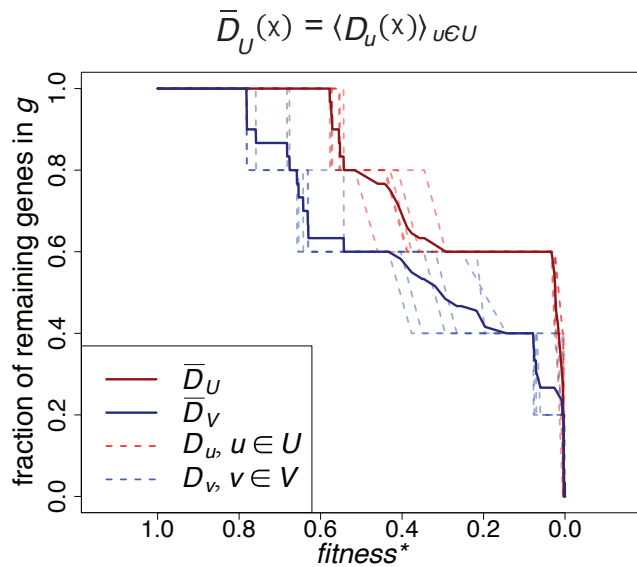

B

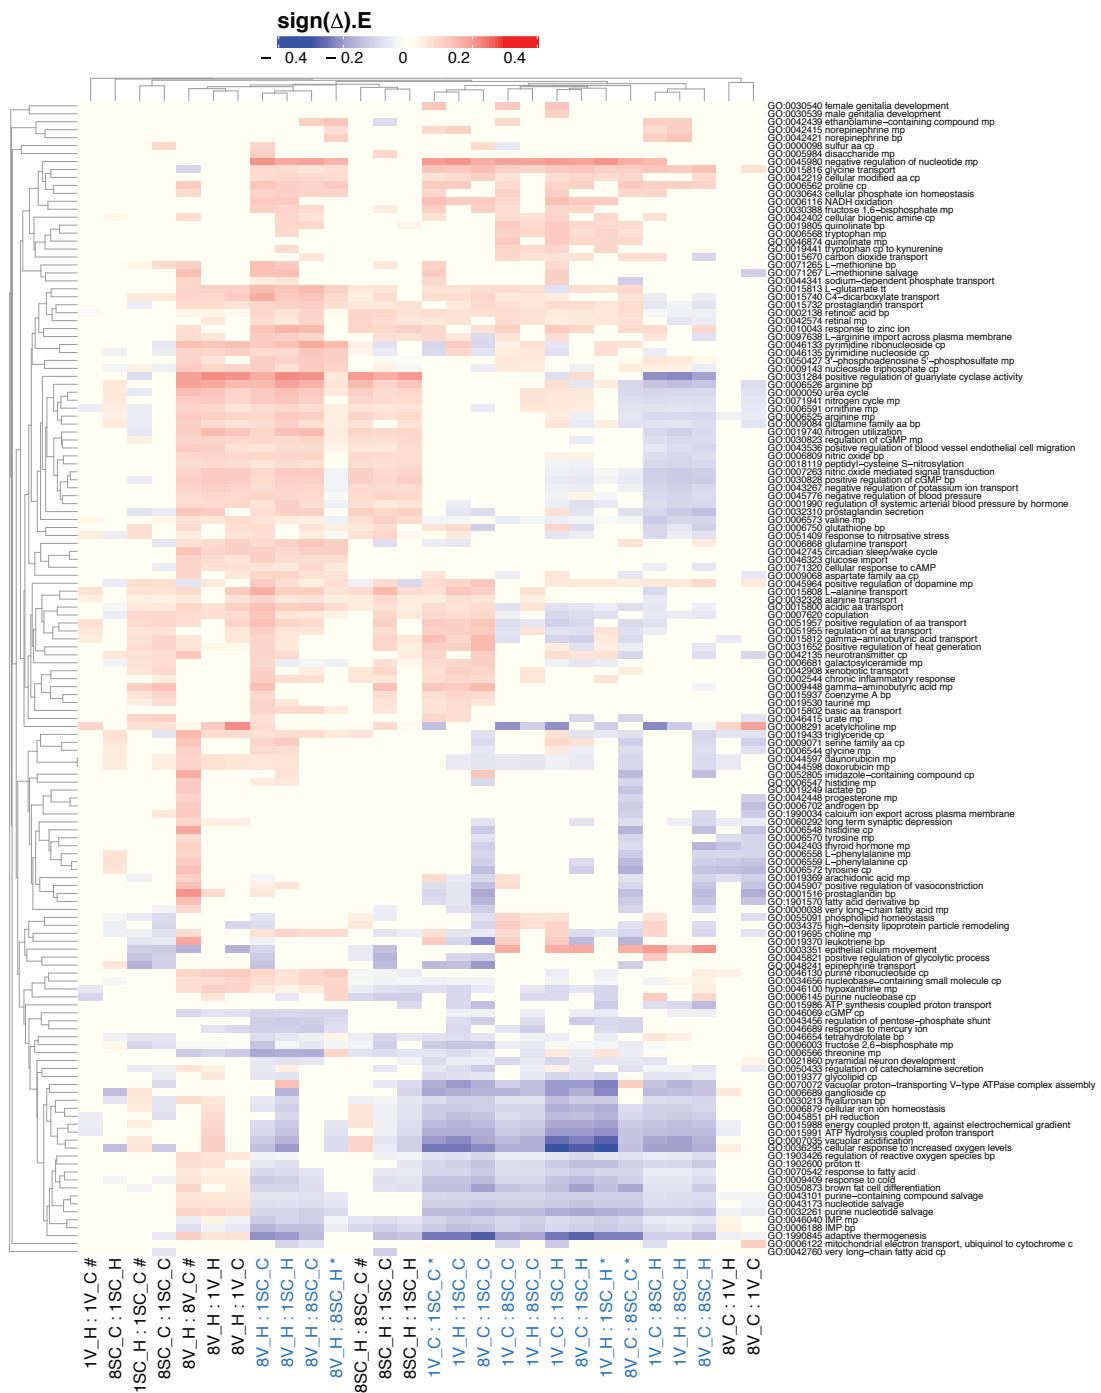



**Table S1*****Focal adhesion & ECM-receptor interaction***  
**1 week**

| <b>Gene Name</b> | <b>Fold Change vWAT</b> | <b>p. Value vWAT</b> | <b>Fold Change scWAT</b> | <b>p. Value scWAT</b> |
|------------------|-------------------------|----------------------|--------------------------|-----------------------|
| Akt1             | 0.30                    | 1.3E-05              | 0.21                     | 5.5E-04               |
| Akt2             | 0.30                    | 4.2E-05              | 0.23                     | 7.7E-04               |
| Capn2            | 0.25                    | 2.2E-04              | 0.23                     | 6.1E-04               |
| Ccnd2            | -0.22                   | 6.1E-03              | -0.33                    | 1.3E-04               |
| Col1a1           | 0.59                    | 2.7E-04              | 0.63                     | 1.2E-04               |
| Col1a2           | 0.53                    | 6.8E-05              | 0.64                     | 6.2E-06               |
| Col3a1           | 0.42                    | 1.1E-04              | 0.58                     | 1.7E-06               |
| Col4a1           | 0.53                    | 7.6E-06              | 0.45                     | 6.8E-05               |
| Col4a2           | 0.56                    | 1.4E-05              | 0.42                     | 3.3E-04               |
| Col5a1           | 0.61                    | 1.1E-07              | 0.58                     | 2.4E-07               |
| Col5a2           | 0.42                    | 3.9E-06              | 0.48                     | 6.1E-07               |
| Col5a3           | 0.53                    | 1.3E-04              | 0.35                     | 6.0E-03               |
| Col6a1           | 0.84                    | 2.0E-10              | 0.68                     | 7.7E-09               |
| Col6a2           | 0.85                    | 1.3E-09              | 0.59                     | 5.3E-07               |
| Col6a3           | 0.56                    | 1.0E-06              | 0.44                     | 3.4E-05               |
| Flna             | 0.40                    | 2.1E-06              | 0.29                     | 1.1E-04               |
| Flnb             | 0.40                    | 1.2E-06              | 0.33                     | 1.4E-05               |
| Itga5            | 0.35                    | 2.8E-03              | 0.33                     | 4.4E-03               |
| Itga7            | 0.61                    | 6.3E-06              | 0.55                     | 2.6E-05               |
| Jun              | 0.44                    | 2.0E-03              | 0.65                     | 3.5E-05               |
| Lamb2            | 0.48                    | 1.7E-04              | 0.45                     | 3.5E-04               |
| Lamb3            | 0.63                    | 1.8E-05              | 0.66                     | 9.4E-06               |
| Lamc1            | 0.24                    | 3.1E-04              | 0.32                     | 7.6E-06               |
| Met              | -0.30                   | 7.9E-04              | -0.27                    | 2.3E-03               |
| Myl12a           | 0.27                    | 1.0E-04              | 0.30                     | 3.6E-05               |
| Parva            | 0.21                    | 2.3E-03              | 0.18                     | 5.9E-03               |
| Pdgfa            | 0.37                    | 2.0E-03              | 0.37                     | 2.2E-03               |
| Pdgfb            | 0.43                    | 1.1E-04              | 0.31                     | 2.6E-03               |
| Thbs2            | 0.48                    | 1.3E-03              | 0.60                     | 1.5E-04               |
| Thbs3            | 0.45                    | 5.2E-04              | 0.60                     | 1.6E-05               |
| Tln1             | 0.34                    | 7.1E-06              | 0.21                     | 1.9E-03               |
| Tln2             | 0.33                    | 1.8E-03              | 0.53                     | 1.0E-05               |
| Tnxb             | 0.52                    | 3.4E-04              | 0.55                     | 1.9E-04               |
| Vwf              | 0.45                    | 6.5E-04              | 0.47                     | 5.0E-04               |



Table S2

## vWAT

| <b>Alcoholism<br/>1 week</b> |                    |                |
|------------------------------|--------------------|----------------|
| <b>Gene Name</b>             | <b>Fold Change</b> | <b>p.Value</b> |
| <i>Creb3l4</i>               | -1.39              | 0.00291        |
| <b>Hist2h2be</b>             | -0.36              | 0.00014        |
| <i>Hdac2</i>                 | -0.24              | 0.00089        |
| <i>Atf2</i>                  | -0.18              | 0.00334        |
| <i>Gnas</i>                  | 0.17               | 0.00039        |
| <i>Atf4</i>                  | 0.18               | 0.00373        |
| <i>Creb3</i>                 | 0.18               | 0.00038        |
| <b>Hist1h2be</b>             | 0.26               | 0.00192        |
| <i>Calm3</i>                 | 0.27               | 0.00359        |
| <i>Hras</i>                  | 0.30               | 0.00251        |
| <i>Ntrk2</i>                 | 0.31               | 0.00002        |
| <i>Hdac5</i>                 | 0.31               | 0.00268        |
| <i>Adora2a</i>               | 0.36               | 0.00191        |
| <i>Gnai2</i>                 | 0.37               | 0.00001        |
| <i>Gnb2</i>                  | 0.38               | 0.00070        |
| <i>Creb3l1</i>               | 0.39               | 0.00224        |
| <b>Hist1h4d</b>              | 0.41               | 0.00340        |
| <b>H2afj</b>                 | 0.42               | 0.00292        |
| <b>Hist2h4</b>               | 0.54               | 0.00001        |
| <b>Hist1h4h</b>              | 0.54               | 0.00035        |
| <b>Hist4h4</b>               | 0.64               | 0.00157        |
| <b>Hist2h2ac</b>             | 0.69               | 0.00104        |
| <b>Hist1h3e</b>              | 0.74               | 0.00052        |
| <b>Hist1h3f</b>              | 0.84               | 0.00016        |
| <b>Hist1h2bb</b>             | 0.84               | 0.00017        |
| <b>Hist1h3a</b>              | 0.87               | 0.00325        |
| <b>Hist1h2bg</b>             | 0.87               | 0.00035        |
| <b>Hist2h2bb</b>             | 0.92               | 0.00008        |
| <b>Hist1h3d</b>              | 0.97               | 0.00127        |
| <b>Hist1h3b</b>              | 0.97               | 0.00385        |
| <b>Hist1h3c</b>              | 1.02               | 0.00027        |
| <b>Hist1h4f</b>              | 1.04               | 0.00001        |
| <b>Hist1h3g</b>              | 1.05               | 0.00266        |
| <i>Adcy5</i>                 | 1.06               | 0.00000        |
| <b>Hist1h2bh</b>             | 1.08               | 0.00142        |
| <b>Hist1h2bn</b>             | 1.11               | 0.00006        |
| <b>Hist1h2bl</b>             | 1.17               | 0.00107        |
| <b>Hist1h2ab</b>             | 1.19               | 0.00147        |
| <b>Hist1h2bj</b>             | 1.19               | 0.00157        |
| <b>Hist1h2bk</b>             | 1.20               | 0.00322        |
| <b>Hist1h2af</b>             | 1.35               | 0.00027        |
| <b>Hist1h3i</b>              | 1.36               | 0.00055        |
| <b>Hist1h2an</b>             | 1.38               | 0.00329        |

| <b>Systemic Lupus Erythematosus<br/>1, 8 &amp; 20 weeks</b> |                    |                |
|-------------------------------------------------------------|--------------------|----------------|
| <b>Gene Name</b>                                            | <b>Fold Change</b> | <b>p.Value</b> |
| <b>Hist2h2be</b>                                            | -0.36              | 0.00014        |
| <b>Hist1h2be</b>                                            | 0.26               | 0.00192        |
| <i>Snrpb</i>                                                | 0.31               | 0.00359        |
| <i>C4b</i>                                                  | 0.35               | 0.00525        |
| <i>C1qb</i>                                                 | 0.38               | 0.00065        |
| <b>Hist1h4d</b>                                             | 0.41               | 0.00340        |
| <i>C1qa</i>                                                 | 0.42               | 0.00057        |
| <b>H2afj</b>                                                | 0.42               | 0.00292        |
| <i>C1qc</i>                                                 | 0.44               | 0.00012        |
| <b>Hist2h4</b>                                              | 0.54               | 0.00001        |
| <b>Hist1h4h</b>                                             | 0.54               | 0.00035        |
| <b>Hist4h4</b>                                              | 0.64               | 0.00157        |
| <b>Hist2h2ac</b>                                            | 0.69               | 0.00104        |
| <b>Hist1h3e</b>                                             | 0.74               | 0.00052        |
| <b>Hist1h3f</b>                                             | 0.84               | 0.00016        |
| <b>Hist1h2bb</b>                                            | 0.84               | 0.00017        |
| <b>Hist1h3a</b>                                             | 0.87               | 0.00325        |
| <b>Hist1h2bg</b>                                            | 0.87               | 0.00035        |
| <b>Hist2h2bb</b>                                            | 0.92               | 0.00008        |
| <b>Hist1h3d</b>                                             | 0.97               | 0.00127        |
| <b>Hist1h3b</b>                                             | 0.97               | 0.00385        |
| <b>Hist1h3c</b>                                             | 1.02               | 0.00027        |
| <b>Hist1h4f</b>                                             | 1.04               | 0.00001        |
| <b>Hist1h3g</b>                                             | 1.05               | 0.00266        |
| <b>Hist1h2bh</b>                                            | 1.08               | 0.00142        |
| <b>Hist1h2bn</b>                                            | 1.11               | 0.00006        |
| <b>Hist1h2bl</b>                                            | 1.17               | 0.00107        |
| <b>Hist1h2ab</b>                                            | 1.19               | 0.00147        |
| <b>Hist1h2bj</b>                                            | 1.19               | 0.00157        |
| <b>Hist1h2bk</b>                                            | 1.20               | 0.00322        |
| <b>Hist1h2af</b>                                            | 1.35               | 0.00027        |
| <b>Hist1h3i</b>                                             | 1.36               | 0.00055        |
| <b>Hist1h2an</b>                                            | 1.38               | 0.00329        |

Table S3

## 1 week scWAT

## Parkinson Dis

| Gene Name      | Fold Change | p.Value |
|----------------|-------------|---------|
| <b>Casp3</b>   | -0.82       | 8E-07   |
| <b>Ndufs4</b>  | -0.43       | 1E-06   |
| <i>Ubb</i>     | 0.44        | 1E-05   |
| <b>Ndufb9</b>  | -0.37       | 3E-05   |
| <b>Sdhd</b>    | -0.37       | 3E-05   |
| <b>Cox5a</b>   | -0.47       | 4E-05   |
| <b>Ndufs1</b>  | -0.38       | 7E-05   |
| <b>Sdha</b>    | -0.30       | 1E-04   |
| <b>Uqcrh</b>   | -0.30       | 1E-04   |
| <b>Ndufv2</b>  | -0.38       | 2E-04   |
| <b>Ndufb5</b>  | -0.30       | 2E-04   |
| <b>Uqcrc2</b>  | -0.36       | 2E-04   |
| <i>Pink1</i>   | 0.36        | 2E-04   |
| <b>Ndufa10</b> | -0.37       | 3E-04   |
| <b>Uqcrq</b>   | -0.45       | 3E-04   |
| <b>Cycs</b>    | -0.66       | 3E-04   |
| <b>Atp5o</b>   | -0.24       | 7E-04   |
| <b>Cox7b</b>   | -0.40       | 8E-04   |
| <b>Ndufa6</b>  | -0.30       | 8E-04   |
| <b>Ndufa4</b>  | -0.32       | 9E-04   |
| <b>Cox7a2</b>  |             | E-04    |
|                |             | E-03    |
|                |             | E-03    |
| <b>Cox6b1</b>  | -0.32       | 1E-03   |
| <b>Sdhc</b>    | -0.24       | 2E-03   |
| <b>Ndufab1</b> | -0.29       | 2E-03   |
| <b>Ndufa12</b> | -0.34       | 2E-03   |
| <i>Lrrk2</i>   | -0.27       | 2E-03   |
| <b>Cox6c</b>   | -0.36       | 3E-03   |
| <b>Ndufa1</b>  | -0.30       | 3E-03   |
| <i>Ppif</i>    | -0.34       | 3E-03   |
| <b>Cox6a1</b>  | -0.31       | 4E-03   |
| <i>Vdac2</i>   | -0.20       | 4E-03   |
| <b>Ndufb6</b>  | -0.37       | 4E-03   |
| <b>Atp5a1</b>  | -0.22       | 4E-03   |
| <b>Uqcrb</b>   | -0.46       | 5E-03   |
| <b>Ndufa5</b>  | -0.32       | 5E-03   |
| <b>Sdhb</b>    | -0.23       | 5E-03   |

## Alzheimer Dis

| Gene Name      | Fold Change | p.Value |
|----------------|-------------|---------|
| <b>Casp3</b>   | -0.82       | 8E-07   |
| <b>Cycs</b>    | -0.66       | 3E-04   |
| <b>Cox5a</b>   | -0.47       | 4E-05   |
| <b>Uqcrb</b>   | -0.46       | 5E-03   |
| <b>Uqcrq</b>   | -0.45       | 3E-04   |
| <b>Ndufs4</b>  | -0.43       | 1E-06   |
| <b>Cox7b</b>   | -0.40       | 8E-04   |
| <b>Uqcr10</b>  | -0.40       | 1E-03   |
| <b>Ndufs1</b>  | -0.38       | 7E-05   |
| <b>Ndufv2</b>  | -0.38       | 2E-04   |
| <b>Ndufb6</b>  | -0.37       | 4E-03   |
| <b>Ndufb9</b>  | -0.37       | 3E-05   |
| <b>Ndufa10</b> | -0.37       | 3E-04   |
| <b>Sdhd</b>    | -0.37       | 3E-05   |
| <b>Uqcrc2</b>  | -0.36       | 2E-04   |
| <b>Cox6c</b>   | -0.36       | 3E-03   |
| <b>Atp5f1</b>  | -0.35       | 1E-03   |
| <i>Ide</i>     | -0.34       | 3E-03   |
| <b>Ndufa12</b> | -0.34       | 2E-03   |
| <b>Ndufa4</b>  | -0.32       | 9E-04   |
| <b>Cox7a2</b>  | -0.32       | 9E-04   |
| <b>Cox6b1</b>  | -0.32       | 1E-03   |
| <b>Ndufa5</b>  | -0.32       | 5E-03   |
| <b>Cox6a1</b>  | -0.31       | 4E-03   |
| <b>Sdha</b>    | -0.30       | 1E-04   |
| <b>Uqcrh</b>   | -0.30       | 1E-04   |
| <b>Ndufb5</b>  | -0.30       | 2E-04   |
| <b>Ndufa6</b>  | -0.30       | 8E-04   |
| <b>Ndufa1</b>  | -0.30       | 3E-03   |
| <b>Ndufab1</b> | -0.29       | 2E-03   |
| <b>Atp5o</b>   | -0.24       | 7E-04   |
| <b>Sdhc</b>    | -0.24       | 2E-03   |
| <b>Sdhb</b>    | -0.23       | 5E-03   |
| <b>Atp5a1</b>  | -0.22       | 4E-03   |
| <i>Capn2</i>   | 0.23        | 6E-04   |
| <i>Calm3</i>   | 0.29        | 2E-03   |
| <i>Psen2</i>   | 0.36        | 1E-05   |
| <i>Apbb1</i>   | 0.37        | 9E-04   |
| <i>App</i>     | 0.41        | 9E-07   |
| <i>Lrp1</i>    | 0.48        | 5E-05   |
| <i>Apoe</i>    | 0.48        | 2E-05   |

## Huntington Dis

| Gene Name      | Fold Change | p.Value |
|----------------|-------------|---------|
| <b>Casp3</b>   | -0.82       | 8E-07   |
| <b>Cycs</b>    | -0.66       | 3E-04   |
| <b>Cox5a</b>   | -0.47       | 4E-05   |
| <b>Uqcrb</b>   | -0.46       | 5E-03   |
| <b>Uqcrq</b>   | -0.45       | 3E-04   |
| <b>Ndufs4</b>  | -0.43       | 1E-06   |
| <b>Cox7b</b>   | -0.40       | 8E-04   |
| <b>Uqcr10</b>  | -0.40       | 1E-03   |
| <b>Ndufs1</b>  | -0.38       | 7E-05   |
| <b>Ndufv2</b>  | -0.38       | 2E-04   |
| <b>Ndufb6</b>  | -0.37       | 4E-03   |
| <b>Ndufb9</b>  | -0.37       | 3E-05   |
| <b>Ndufa10</b> | -0.37       | 3E-04   |
| <b>Sdhd</b>    | -0.37       | 3E-05   |
| <b>Uqcrc2</b>  | -0.36       | 2E-04   |
| <b>Cox6c</b>   | -0.36       | 3E-03   |
| <b>Atp5f1</b>  | -0.35       | 1E-03   |
| <i>Ppif</i>    | -0.34       | 3E-03   |
| <b>Ndufa12</b> | -0.34       | 2E-03   |
| <b>Ndufa4</b>  | -0.32       | 9E-04   |
| <b>Cox7a2</b>  | -0.32       | 9E-04   |
| <b>Cox6b1</b>  | -0.32       | 1E-03   |
| <b>Ndufa5</b>  | -0.32       | 5E-03   |
| <b>Cox6a1</b>  | -0.31       | 4E-03   |
| <b>Sdha</b>    | -0.30       | 1E-04   |
| <b>Uqcrh</b>   | -0.30       | 1E-04   |
| <b>Ndufb5</b>  | -0.30       | 2E-04   |
| <b>Ndufa6</b>  | -0.30       | 8E-04   |
| <b>Ndufa1</b>  | -0.30       | 3E-03   |
| <b>Ndufab1</b> | -0.29       | 2E-03   |
| <b>Atp5o</b>   | -0.24       | 7E-04   |
| <b>Sdhc</b>    | -0.24       | 2E-03   |
| <b>Sdhb</b>    | -0.23       | 5E-03   |
| <b>Atp5a1</b>  | -0.22       | 4E-03   |
| <i>Pparg</i>   | -0.21       | 2E-03   |
| <i>Tfam</i>    | -0.21       | 6E-03   |
| <i>Vdac2</i>   | -0.20       | 4E-03   |
| <i>Creb3</i>   | 0.16        | 1E-03   |
| <i>Hip1</i>    | 0.27        | 2E-03   |
| <i>Cltb</i>    | 0.34        | 2E-05   |
| <i>Creb3l1</i> | 0.44        | 8E-04   |
| <i>Dnah3</i>   | 0.79        | 5E-03   |

Table S4

| <b>A</b>                                         |                        |                | <b>B</b>                                                    |  |
|--------------------------------------------------|------------------------|----------------|-------------------------------------------------------------|--|
| <b>Cell cycle<br/>8 &amp; 20 weeks<br/>scWAT</b> |                        |                | <b>Systemic Lupus Erythematosus<br/>1, 8 &amp; 20 weeks</b> |  |
| <b>Gene<br/>Name</b>                             | <b>Fold<br/>Change</b> | <b>p.Value</b> | <b>Gene Name</b>                                            |  |
| <i>Cdk1</i>                                      | 1.87                   | 4.99E-10       | <i>Hist2h2be</i>                                            |  |
| <i>Chek2</i>                                     | 0.79                   | 5.87E-10       | <i>Hist1h2be</i>                                            |  |
| <i>Ccna2</i>                                     | 1.66                   | 7.83E-10       | <i>C4b</i>                                                  |  |
| <i>Cdkn1a</i>                                    | 1.11                   | 1.98E-08       | <i>Hist1h3e</i>                                             |  |
| <i>Ccne1</i>                                     | 1.02                   | 1.53E-07       | <i>Hist1h3f</i>                                             |  |
| <i>Mad2l1</i>                                    | 0.72                   | 2.91E-07       | <i>Hist1h2bb</i>                                            |  |
| <i>Bub1b</i>                                     | 1.13                   | 4.16E-07       | <i>Hist1h3a</i>                                             |  |
| <i>Cdkn2c</i>                                    | -0.70                  | 5.14E-07       | <i>Hist1h2bg</i>                                            |  |
| <i>Gadd45b</i>                                   | 1.30                   | 5.59E-07       | <i>Hist2h2bb</i>                                            |  |
| <i>Dbf4</i>                                      | 0.89                   | 1.21E-06       | <i>Hist1h3d</i>                                             |  |
| <i>Mcm6</i>                                      | 0.56                   | 1.22E-06       | <i>Hist1h3b</i>                                             |  |
| <i>E2f1</i>                                      | 0.72                   | 2.24E-06       | <i>Hist1h3c</i>                                             |  |
| <i>Ccnb1</i>                                     | 1.57                   | 2.52E-06       | <i>Hist1h4f</i>                                             |  |
| <i>Ccnb2</i>                                     | 1.54                   | 3.88E-06       | <i>Hist1h3g</i>                                             |  |
| <i>Ywhah</i>                                     | 0.43                   | 4.27E-06       | <i>Hist1h2bh</i>                                            |  |
| <i>Cdkn2b</i>                                    | 0.76                   | 7.38E-06       | <i>Hist1h2bn</i>                                            |  |
| <i>Mcm3</i>                                      | 0.55                   | 7.53E-06       | <i>Hist1h2bl</i>                                            |  |
| <i>Tfdp1</i>                                     | 0.27                   | 9.59E-06       | <i>Hist1h2ab</i>                                            |  |
| <i>Mcm5</i>                                      | 0.90                   | 1.11E-05       | <i>Hist1h2bj</i>                                            |  |
| <i>Bub1</i>                                      | 1.71                   | 1.16E-05       | <i>Hist1h2bk</i>                                            |  |
| <i>Rad21</i>                                     | -0.30                  | 2.71E-05       | <i>Hist1h2af</i>                                            |  |
| <i>Orc1</i>                                      | 1.64                   | 2.82E-05       | <i>Hist1h3i</i>                                             |  |
| <i>Rbl2</i>                                      | -0.22                  | 2.92E-05       | <i>Hist1h2an</i>                                            |  |
| <i>Cdc20</i>                                     | 1.54                   | 3.75E-05       |                                                             |  |
| <i>Ccnd1</i>                                     | 0.82                   | 4.56E-05       |                                                             |  |
| <i>Cdkn1c</i>                                    | -0.76                  | 5.30E-05       |                                                             |  |
| <i>Prkdc</i>                                     | -0.31                  | 7.10E-05       |                                                             |  |
| <i>Cdc25c</i>                                    | 2.03                   | 8.13E-05       |                                                             |  |
| <i>Ywhaz</i>                                     | 0.26                   | 1.29E-04       |                                                             |  |
| <i>Ep300</i>                                     | -0.32                  | 1.34E-04       |                                                             |  |
| <i>Cdc45</i>                                     | 0.44                   | 1.47E-04       |                                                             |  |
| <i>Mcm2</i>                                      | 0.54                   | 1.53E-04       |                                                             |  |
| <i>Ttk</i>                                       | 1.41                   | 1.76E-04       |                                                             |  |
| <i>E2f3</i>                                      | 0.30                   | 2.32E-04       |                                                             |  |
| <i>Plk1</i>                                      | 1.32                   | 3.16E-04       |                                                             |  |
| <i>Mdm2</i>                                      | 0.21                   | 6.62E-04       |                                                             |  |
| <i>Ccne2</i>                                     | 0.62                   | 6.95E-04       |                                                             |  |
| <i>Ywhab</i>                                     | 0.29                   | 1.43E-03       |                                                             |  |
| <i>Ywhaq</i>                                     | 0.29                   | 1.59E-03       |                                                             |  |
| <i>Cdkn1b</i>                                    | -0.28                  | 1.64E-03       |                                                             |  |
| <i>Tgfb3</i>                                     | -0.31                  | 1.75E-03       |                                                             |  |
| <i>Gsk3b</i>                                     | 0.25                   | 1.89E-03       |                                                             |  |
| <i>Stag1</i>                                     | -0.22                  | 2.30E-03       |                                                             |  |
| <i>Cdc27</i>                                     | 0.29                   | 2.41E-03       |                                                             |  |
| <i>Orc3</i>                                      | -0.23                  | 2.90E-03       |                                                             |  |
| <i>Mad1l1</i>                                    | 0.39                   | 3.22E-03       |                                                             |  |
| <i>E2f5</i>                                      | -0.28                  | 4.26E-03       |                                                             |  |
| <i>Crebbp</i>                                    | -0.20                  | 4.37E-03       |                                                             |  |
| <i>Esp1</i>                                      | 0.83                   | 4.52E-03       |                                                             |  |
| <i>Pcna</i>                                      | 0.30                   | 5.27E-03       |                                                             |  |
| <i>Cdc7</i>                                      | 0.31                   | 5.66E-03       |                                                             |  |
| <i>Cdc14b</i>                                    | -0.23                  | 6.43E-03       |                                                             |  |
| <i>Stag2</i>                                     | -0.20                  | 1.10E-02       |                                                             |  |
| <i>Cdk6</i>                                      | 0.40                   | 1.36E-02       |                                                             |  |
| <i>Cul1</i>                                      | -0.14                  | 1.44E-02       |                                                             |  |
| <i>Cdc6</i>                                      | 0.34                   | 1.56E-02       |                                                             |  |
| <i>Tgfb1</i>                                     | 0.31                   | 2.30E-02       |                                                             |  |
| <i>Hdac1</i>                                     | -0.13                  | 3.76E-02       |                                                             |  |
